# Supplementary material for: A decade of improvements in equity of access to reproductive and maternal health services in Cambodia, 2000–2010
Source: PubMed Central journal article supplement (PMC3723953; doi:10.1186/1475-9276-12-51), 2013-07-09
Supplement: 1475-9276-12-51-S1.pdf [file 1475-9276-12-51-S1.pdf]

## Additional File 1

**Table A1i: Equity in reproductive and maternal health services Cambodia, 2000, measured by multiple social stratification variables**

| Service                      | Overall % service use | Social stratification variable | % service use | Equity gap (Q5-Q1/ most ed-least ed, % points) | Equity ratio <sup>§</sup> | Indirectly standardised concentration index (95% CI) |                       |
|------------------------------|-----------------------|--------------------------------|---------------|------------------------------------------------|---------------------------|------------------------------------------------------|-----------------------|
| 4+ Antenatal care            | 9.01%                 | Household assets               | Q1 (poorest)  | 2.22%                                          | 19.25%                    | 9.67                                                 | 0.43<br>(0.16 , 0.70) |
|                              |                       |                                | Q2            | 5.40%                                          |                           |                                                      |                       |
|                              |                       |                                | Q3            | 5.28%                                          |                           |                                                      |                       |
|                              |                       |                                | Q4            | 6.05%                                          |                           |                                                      |                       |
|                              |                       |                                | Q5 (richest)  | 21.47%                                         |                           |                                                      |                       |
|                              |                       | Education                      | 0-3 years     | 4.10%                                          | 47.98%                    | 12.70                                                | 0.42<br>(0.39 , 0.45) |
|                              |                       |                                | 4-6 years     | 6.96%                                          |                           |                                                      |                       |
|                              |                       |                                | 7-9 years     | 19.20%                                         |                           |                                                      |                       |
|                              |                       |                                | 10-12 years   | 19.46%                                         |                           |                                                      |                       |
|                              |                       |                                | 13+ years     | 52.08%                                         |                           |                                                      |                       |
| Skilled birth attendance     | 32.21%                | Household assets               | Q1 (poorest)  | 14.31%                                         | 51.84%                    | 4.62                                                 | 0.33<br>(0.29 , 0.37) |
|                              |                       |                                | Q2            | 16.88%                                         |                           |                                                      |                       |
|                              |                       |                                | Q3            | 22.83%                                         |                           |                                                      |                       |
|                              |                       |                                | Q4            | 29.48%                                         |                           |                                                      |                       |
|                              |                       |                                | Q5 (richest)  | 66.15%                                         |                           |                                                      |                       |
|                              |                       | Education                      | 0-3 years     | 18.25%                                         | 68.85%                    | 4.77                                                 | 0.26<br>(0.21 , 0.31) |
|                              |                       |                                | 4-6 years     | 30.92%                                         |                           |                                                      |                       |
|                              |                       |                                | 7-9 years     | 53.74%                                         |                           |                                                      |                       |
|                              |                       |                                | 10-12 years   | 74.13%                                         |                           |                                                      |                       |
|                              |                       |                                | 13+ years     | 87.10%                                         |                           |                                                      |                       |
| Facility-based delivery      | 10.04%                | Household assets               | Q1 (poorest)  | 1.82%                                          | 27.39%                    | 16.05                                                | 0.58<br>(0.52 , 0.64) |
|                              |                       |                                | Q2            | 3.00%                                          |                           |                                                      |                       |
|                              |                       |                                | Q3            | 3.88%                                          |                           |                                                      |                       |
|                              |                       |                                | Q4            | 6.43%                                          |                           |                                                      |                       |
|                              |                       |                                | Q5 (richest)  | 29.21%                                         |                           |                                                      |                       |
|                              |                       | Education                      | 0-3 years     | 3.66%                                          | 54.40%                    | 15.86                                                | 0.43<br>(0.36 , 0.50) |
|                              |                       |                                | 4-6 years     | 7.97%                                          |                           |                                                      |                       |
|                              |                       |                                | 7-9 years     | 18.66%                                         |                           |                                                      |                       |
|                              |                       |                                | 10-12 years   | 41.15%                                         |                           |                                                      |                       |
|                              |                       |                                | 13+ years     | 58.06%                                         |                           |                                                      |                       |
| Postnatal care               | 54.62%                | Household assets               | Q1 (poorest)  | 40.89%                                         | 29.64%                    | 1.72                                                 | 0.10<br>(0.08 , 0.12) |
|                              |                       |                                | Q2            | 45.31%                                         |                           |                                                      |                       |
|                              |                       |                                | Q3            | 46.56%                                         |                           |                                                      |                       |
|                              |                       |                                | Q4            | 49.62%                                         |                           |                                                      |                       |
|                              |                       |                                | Q5 (richest)  | 70.53%                                         |                           |                                                      |                       |
|                              |                       | Education                      | 0-3 years     | 45.42%                                         | 38.45%                    | 1.85                                                 | 0.09<br>(0.07 , 0.11) |
|                              |                       |                                | 4-6 years     | 49.92%                                         |                           |                                                      |                       |
|                              |                       |                                | 7-9 years     | 60.68%                                         |                           |                                                      |                       |
|                              |                       |                                | 10-12 years   | 79.15%                                         |                           |                                                      |                       |
|                              |                       |                                | 13+ years     | 83.87%                                         |                           |                                                      |                       |
| Met need for family planning | 24.41%                | Household assets               | Q1 (poorest)  | 17.25%                                         | 24.39%                    | 2.99                                                 | 0.21<br>(0.18 , 0.24) |
|                              |                       |                                | Q2            | 17.97%                                         |                           |                                                      |                       |
|                              |                       |                                | Q3            | 23.33%                                         |                           |                                                      |                       |
|                              |                       |                                | Q4            | 24.70%                                         |                           |                                                      |                       |
|                              |                       |                                | Q5 (richest)  | 36.64%                                         |                           |                                                      |                       |
|                              |                       | Education                      | 0-3 years     | 18.08%                                         | 19.81%                    | 2.10                                                 | 0.12<br>(0.09 , 0.15) |
|                              |                       |                                | 4-6 years     | 23.69%                                         |                           |                                                      |                       |
|                              |                       |                                | 7-9 years     | 28.99%                                         |                           |                                                      |                       |
|                              |                       |                                | 10-12 years   | 39.75%                                         |                           |                                                      |                       |
|                              |                       |                                | 13+ years     | 37.89%                                         |                           |                                                      |                       |
| Abortion by skilled provider | 81.88%                | Household assets               | Q1 (poorest)  | 58.62%                                         | 39.11%                    | 1.67                                                 | 0.10<br>(0.06 , 0.14) |
|                              |                       |                                | Q2            | 79.25%                                         |                           |                                                      |                       |
|                              |                       |                                | Q3            | 75.56%                                         |                           |                                                      |                       |
|                              |                       |                                | Q4            | 88.33%                                         |                           |                                                      |                       |
|                              |                       |                                | Q5 (richest)  | 97.73%                                         |                           |                                                      |                       |
|                              |                       | Education                      | 0-3 years     | 67.80%                                         | 32.20%                    | 1.47                                                 | 0.07<br>(0.03 , 0.11) |
|                              |                       |                                | 4-6 years     | 86.81%                                         |                           |                                                      |                       |
|                              |                       |                                | 7-9 years     | 89.19%                                         |                           |                                                      |                       |
|                              |                       |                                | 10-12 years   | 100.00%                                        |                           |                                                      |                       |
|                              |                       |                                | 13+ years     | 100.00%                                        |                           |                                                      |                       |

<sup>§</sup> Calculated as proportion of service use in richest wealth quintile/most educated group divided by proportion of service use in poorest quintile/least educated group

**Table A1ii: Equity in reproductive and maternal health services Cambodia, 2005, measured by multiple social stratification variables**

| Service                      | Overall % service use | Social stratification variable | % service use | Equity gap (Q5-Q1/most ed-least ed, % points) | Equity ratio <sup>§</sup> | Indirectly standardised concentration index (95% CI) |                        |
|------------------------------|-----------------------|--------------------------------|---------------|-----------------------------------------------|---------------------------|------------------------------------------------------|------------------------|
| 4+ Antenatal care            | 26.98%                | Household assets               | Q1 (poorest)  | 13.78%                                        | 37.64%                    | 3.73                                                 | 0.28<br>(0.25 , 0.31)  |
|                              |                       |                                | Q2            | 15.58%                                        |                           |                                                      |                        |
|                              |                       |                                | Q3            | 19.85%                                        |                           |                                                      |                        |
|                              |                       |                                | Q4            | 27.65%                                        |                           |                                                      |                        |
|                              |                       |                                | Q5 (richest)  | 51.42%                                        |                           |                                                      |                        |
|                              |                       | Education                      | 0-3 years     | 14.45%                                        | 64.96%                    | 5.50                                                 | 0.26<br>(0.23 , 0.29)  |
|                              |                       |                                | 4-6 years     | 25.88%                                        |                           |                                                      |                        |
|                              |                       |                                | 7-9 years     | 39.94%                                        |                           |                                                      |                        |
|                              |                       |                                | 10-12 years   | 55.17%                                        |                           |                                                      |                        |
|                              |                       |                                | 13+ years     | 79.41%                                        |                           |                                                      |                        |
| Skilled birth attendance     | 43.76%                | Household assets               | Q1 (poorest)  | 14.36%                                        | 72.40%                    | 6.04                                                 | 0.35<br>(0.30 , 0.40)  |
|                              |                       |                                | Q2            | 23.05%                                        |                           |                                                      |                        |
|                              |                       |                                | Q3            | 28.68%                                        |                           |                                                      |                        |
|                              |                       |                                | Q4            | 45.51%                                        |                           |                                                      |                        |
|                              |                       |                                | Q5 (richest)  | 86.76%                                        |                           |                                                      |                        |
|                              |                       | Education                      | 0-3 years     | 21.16%                                        | 72.44%                    | 4.42                                                 | 0.29<br>(0.26 , 0.32)  |
|                              |                       |                                | 4-6 years     | 42.12%                                        |                           |                                                      |                        |
|                              |                       |                                | 7-9 years     | 67.13%                                        |                           |                                                      |                        |
|                              |                       |                                | 10-12 years   | 81.69%                                        |                           |                                                      |                        |
|                              |                       |                                | 13+ years     | 93.60%                                        |                           |                                                      |                        |
| Facility-based delivery      | 21.18%                | Household assets               | Q1 (poorest)  | 5.24%                                         | 51.55%                    | 10.84                                                | 0.50<br>(0.43 , 0.57)  |
|                              |                       |                                | Q2            | 6.78%                                         |                           |                                                      |                        |
|                              |                       |                                | Q3            | 10.44%                                        |                           |                                                      |                        |
|                              |                       |                                | Q4            | 16.62%                                        |                           |                                                      |                        |
|                              |                       |                                | Q5 (richest)  | 56.79%                                        |                           |                                                      |                        |
|                              |                       | Education                      | 0-3 years     | 8.45%                                         | 65.95%                    | 8.80                                                 | 0.38<br>(0.33 , 0.43)  |
|                              |                       |                                | 4-6 years     | 18.02%                                        |                           |                                                      |                        |
|                              |                       |                                | 7-9 years     | 35.09%                                        |                           |                                                      |                        |
|                              |                       |                                | 10-12 years   | 50.17%                                        |                           |                                                      |                        |
|                              |                       |                                | 13+ years     | 74.40%                                        |                           |                                                      |                        |
| Postnatal care               | 69.87%                | Household assets               | Q1 (poorest)  | 53.98%                                        | 31.93%                    | 1.59                                                 | 0.09<br>(0.07 , 0.11 ) |
|                              |                       |                                | Q2            | 62.82%                                        |                           |                                                      |                        |
|                              |                       |                                | Q3            | 66.31%                                        |                           |                                                      |                        |
|                              |                       |                                | Q4            | 73.61%                                        |                           |                                                      |                        |
|                              |                       |                                | Q5 (richest)  | 85.91%                                        |                           |                                                      |                        |
|                              |                       | Education                      | 0-3 years     | 61.24%                                        | 34.84%                    | 1.57                                                 | 0.06<br>(0.04 , 0.08)  |
|                              |                       |                                | 4-6 years     | 68.41%                                        |                           |                                                      |                        |
|                              |                       |                                | 7-9 years     | 79.21%                                        |                           |                                                      |                        |
|                              |                       |                                | 10-12 years   | 85.34%                                        |                           |                                                      |                        |
|                              |                       |                                | 13+ years     | 96.08%                                        |                           |                                                      |                        |
| Met need for family planning | 40.42%                | Household assets               | Q1 (poorest)  | 30.65%                                        | 24.10%                    | 1.79                                                 | 0.11<br>(0.09 , 0.13)  |
|                              |                       |                                | Q2            | 35.77%                                        |                           |                                                      |                        |
|                              |                       |                                | Q3            | 36.64%                                        |                           |                                                      |                        |
|                              |                       |                                | Q4            | 41.93%                                        |                           |                                                      |                        |
|                              |                       |                                | Q5 (richest)  | 54.75%                                        |                           |                                                      |                        |
|                              |                       | Education                      | 0-3 years     | 32.34%                                        | 22.00%                    | 1.68                                                 | 0.11<br>(0.09 , 0.13)  |
|                              |                       |                                | 4-6 years     | 42.53%                                        |                           |                                                      |                        |
|                              |                       |                                | 7-9 years     | 48.41%                                        |                           |                                                      |                        |
|                              |                       |                                | 10-12 years   | 54.18%                                        |                           |                                                      |                        |
|                              |                       |                                | 13+ years     | 54.34%                                        |                           |                                                      |                        |
| Abortion by skilled provider | 78.36%                | Household assets               | Q1 (poorest)  | 58.12%                                        | 31.35%                    | 1.54                                                 | 0.07<br>(0.04 , 0.10)  |
|                              |                       |                                | Q2            | 75.38%                                        |                           |                                                      |                        |
|                              |                       |                                | Q3            | 74.44%                                        |                           |                                                      |                        |
|                              |                       |                                | Q4            | 84.33%                                        |                           |                                                      |                        |
|                              |                       |                                | Q5 (richest)  | 89.47%                                        |                           |                                                      |                        |
|                              |                       | Education                      | 0-3 years     | 69.36%                                        | 16.35%                    | 1.24                                                 | 0.06<br>(0.03 , 0.09)  |
|                              |                       |                                | 4-6 years     | 77.00%                                        |                           |                                                      |                        |
|                              |                       |                                | 7-9 years     | 79.31%                                        |                           |                                                      |                        |
|                              |                       |                                | 10-12 years   | 97.22%                                        |                           |                                                      |                        |
|                              |                       |                                | 13+ years     | 85.71%                                        |                           |                                                      |                        |

<sup>§</sup> Calculated as proportion of service use in richest wealth quintile/most educated group divided by proportion of service use in poorest quintile/least educated group

**Table A1iii: Equity in reproductive and maternal health services Cambodia, 2010, measured by multiple socio-economic status variables**

| Service                             | Overall % service use | Social stratification variable | % service use | Equity gap (Q5-Q1/most ed-least ed, % points) | Equity ratio <sup>§</sup> | Indirectly standardised concentration index (95% CI) |                        |
|-------------------------------------|-----------------------|--------------------------------|---------------|-----------------------------------------------|---------------------------|------------------------------------------------------|------------------------|
| <b>4+ Antenatal care</b>            | 57.27%                | Household assets               | Q1 (poorest)  | 37.37%                                        | 42.10%                    | 2.13                                                 | 0.15<br>(0.13 , 0.17)  |
|                                     |                       |                                | Q2            | 45.62%                                        |                           |                                                      |                        |
|                                     |                       |                                | Q3            | 52.73%                                        |                           |                                                      |                        |
|                                     |                       |                                | Q4            | 63.25%                                        |                           |                                                      |                        |
|                                     |                       |                                | Q5 (richest)  | 79.47%                                        |                           |                                                      |                        |
|                                     |                       | Education                      | 0-3 years     | 38.28%                                        | 51.76%                    | 2.35                                                 | 0.15<br>(0.13 , 0.17)  |
|                                     |                       |                                | 4-6 years     | 57.26%                                        |                           |                                                      |                        |
|                                     |                       |                                | 7-9 years     | 70.48%                                        |                           |                                                      |                        |
|                                     |                       |                                | 10-12 years   | 79.03%                                        |                           |                                                      |                        |
|                                     |                       |                                | 13+ years     | 90.04%                                        |                           |                                                      |                        |
| <b>Skilled birth attendance</b>     | 68.81%                | Household assets               | Q1 (poorest)  | 42.23%                                        | 54.57%                    | 2.29                                                 | 0.17<br>(0.15 , 0.19)  |
|                                     |                       |                                | Q2            | 53.42%                                        |                           |                                                      |                        |
|                                     |                       |                                | Q3            | 62.95%                                        |                           |                                                      |                        |
|                                     |                       |                                | Q4            | 79.32%                                        |                           |                                                      |                        |
|                                     |                       |                                | Q5 (richest)  | 96.80%                                        |                           |                                                      |                        |
|                                     |                       | Education                      | 0-3 years     | 47.75%                                        | 51.05%                    | 2.07                                                 | 0.11<br>(0.09 , 0.11)  |
|                                     |                       |                                | 4-6 years     | 70.61%                                        |                           |                                                      |                        |
|                                     |                       |                                | 7-9 years     | 85.10%                                        |                           |                                                      |                        |
|                                     |                       |                                | 10-12 years   | 95.43%                                        |                           |                                                      |                        |
|                                     |                       |                                | 13+ years     | 98.80%                                        |                           |                                                      |                        |
| <b>Facility-based delivery</b>      | 53.07%                | Household assets               | Q1 (poorest)  | 29.16%                                        | 53.69%                    | 2.84                                                 | 0.22<br>(0.20 , 0.24)  |
|                                     |                       |                                | Q2            | 37.34%                                        |                           |                                                      |                        |
|                                     |                       |                                | Q3            | 43.98%                                        |                           |                                                      |                        |
|                                     |                       |                                | Q4            | 57.73%                                        |                           |                                                      |                        |
|                                     |                       |                                | Q5 (richest)  | 82.85%                                        |                           |                                                      |                        |
|                                     |                       | Education                      | 0-3 years     | 33.94%                                        | 56.15%                    | 2.65                                                 | 0.19<br>(0.16 , 0.21)  |
|                                     |                       |                                | 4-6 years     | 51.69%                                        |                           |                                                      |                        |
|                                     |                       |                                | 7-9 years     | 65.74%                                        |                           |                                                      |                        |
|                                     |                       |                                | 10-12 years   | 78.50%                                        |                           |                                                      |                        |
|                                     |                       |                                | 13+ years     | 90.09%                                        |                           |                                                      |                        |
| <b>Postnatal care</b>               | 73.84%                | Household assets               | Q1 (poorest)  | 51.81%                                        | 38.36%                    | 1.74                                                 | 0.12<br>(0.10 , 0.14)  |
|                                     |                       |                                | Q2            | 55.83%                                        |                           |                                                      |                        |
|                                     |                       |                                | Q3            | 59.78%                                        |                           |                                                      |                        |
|                                     |                       |                                | Q4            | 73.83%                                        |                           |                                                      |                        |
|                                     |                       |                                | Q5 (richest)  | 90.17%                                        |                           |                                                      |                        |
|                                     |                       | Education                      | 0-3 years     | 50.40%                                        | 44.65%                    | 1.89                                                 | 0.12<br>(0.10 , 0.14)  |
|                                     |                       |                                | 4-6 years     | 69.60%                                        |                           |                                                      |                        |
|                                     |                       |                                | 7-9 years     | 79.06%                                        |                           |                                                      |                        |
|                                     |                       |                                | 10-12 years   | 87.14%                                        |                           |                                                      |                        |
|                                     |                       |                                | 13+ years     | 95.05%                                        |                           |                                                      |                        |
| <b>Met need for family planning</b> | 50.96%                | Household assets               | Q1 (poorest)  | 41.60%                                        | 13.80%                    | 1.33                                                 | 0.06<br>(0.05 , 0.07)  |
|                                     |                       |                                | Q2            | 46.75%                                        |                           |                                                      |                        |
|                                     |                       |                                | Q3            | 51.29%                                        |                           |                                                      |                        |
|                                     |                       |                                | Q4            | 51.03%                                        |                           |                                                      |                        |
|                                     |                       |                                | Q5 (richest)  | 55.40%                                        |                           |                                                      |                        |
|                                     |                       | Education                      | 0-3 years     | 42.12%                                        | 13.93%                    | 1.33                                                 | 0.06<br>(0.05 , 0.07)  |
|                                     |                       |                                | 4-6 years     | 49.94%                                        |                           |                                                      |                        |
|                                     |                       |                                | 7-9 years     | 54.68%                                        |                           |                                                      |                        |
|                                     |                       |                                | 10-12 years   | 57.57%                                        |                           |                                                      |                        |
|                                     |                       |                                | 13+ years     | 56.05%                                        |                           |                                                      |                        |
| <b>Abortion by skilled provider</b> | 84.48%*               | Household assets               | Q1 (poorest)  | 77.26%                                        | 6.43%                     | 1.08                                                 | 0.01<br>(-0.02 , 0.04) |
|                                     |                       |                                | Q2            | 79.64%                                        |                           |                                                      |                        |
|                                     |                       |                                | Q3            | 84.84%                                        |                           |                                                      |                        |
|                                     |                       |                                | Q4            | 85.65%                                        |                           |                                                      |                        |
|                                     |                       |                                | Q5 (richest)  | 83.69%                                        |                           |                                                      |                        |
|                                     |                       | Education                      | 0-3 years     | 78.55%                                        | 6.64%                     | 1.08                                                 | 0.03<br>(0.00 , 0.06)  |
|                                     |                       |                                | 4-6 years     | 83.64%                                        |                           |                                                      |                        |
|                                     |                       |                                | 7-9 years     | 88.58%                                        |                           |                                                      |                        |
|                                     |                       |                                | 10-12 years   | 84.72%                                        |                           |                                                      |                        |
|                                     |                       |                                | 13+ years     | 85.19%                                        |                           |                                                      |                        |

<sup>§</sup> Calculated as proportion of service use in richest wealth quintile/most educated group divided by proportion of service use in poorest quintile/least educated group

\* Excludes all women who report having a medical abortion, which can be administered at home
