# Supplementary material for: A decade of improvements in equity of access to reproductive and maternal health services in Cambodia, 2000–2010
Source: PubMed Central journal article supplement (PMC3723953; doi:10.1186/1475-9276-12-51), 2013-07-09
Supplement: 1475-9276-12-51-S2.pdf [file 1475-9276-12-51-S2.pdf]

## Additional File 2

Table A2i: Equity in use of reproductive and maternal health services in Cambodia by common and maximum household assets, 2005

| Service                                 | Overall % service use |              | % service use by wealth quintile (max assets) | % service use by wealth quintile (common assets) | Equity gap (Q5-Q1, % points) (max assets) | Equity gap (Q5-Q1, % points) (common assets) | Equity ratio (max assets) § | Equity ratio (common assets) § | Indirectly standardised concentration index (max assets) | Indirectly standardised concentration index (common assets) |
|-----------------------------------------|-----------------------|--------------|-----------------------------------------------|--------------------------------------------------|-------------------------------------------|----------------------------------------------|-----------------------------|--------------------------------|----------------------------------------------------------|-------------------------------------------------------------|
| <b>4+ Antenatal care</b>                | 26.98%                | Q1 (poorest) | 13.78%                                        | 12.57%                                           | 37.64%                                    | 38.96%                                       | 3.73                        | 4.10                           | 0.28<br>(0.25 , 0.31)                                    | 0.29<br>(0.26 , 0.32)                                       |
|                                         |                       | Q2           | 15.58%                                        | 16.11%                                           |                                           |                                              |                             |                                |                                                          |                                                             |
|                                         |                       | Q3           | 19.85%                                        | 20.99%                                           |                                           |                                              |                             |                                |                                                          |                                                             |
|                                         |                       | Q4           | 27.65%                                        | 27.81%                                           |                                           |                                              |                             |                                |                                                          |                                                             |
|                                         |                       | Q5 (richest) | 51.42%                                        | 51.53%                                           |                                           |                                              |                             |                                |                                                          |                                                             |
| <b>Skilled birth attendance</b>         | 43.76%                | Q1 (poorest) | 14.36%                                        | 14.64%                                           | 72.40%                                    | 72.41%                                       | 6.04                        | 5.95                           | 0.35<br>(0.30 , 0.40)                                    | 0.35<br>(0.30 , 0.40)                                       |
|                                         |                       | Q2           | 23.05%                                        | 22.67%                                           |                                           |                                              |                             |                                |                                                          |                                                             |
|                                         |                       | Q3           | 28.68%                                        | 30.62%                                           |                                           |                                              |                             |                                |                                                          |                                                             |
|                                         |                       | Q4           | 45.51%                                        | 45.05%                                           |                                           |                                              |                             |                                |                                                          |                                                             |
|                                         |                       | Q5 (richest) | 86.76%                                        | 87.05%                                           |                                           |                                              |                             |                                |                                                          |                                                             |
| <b>Facility based delivery</b>          | 21.18%                | Q1 (poorest) | 5.24%                                         | 5.47%                                            | 51.55%                                    | 51.42%                                       | 10.84                       | 10.40                          | 0.5<br>(0.43 , 0.57)                                     | 0.46<br>(0.40 , 0.52)                                       |
|                                         |                       | Q2           | 6.78%                                         | 7.23%                                            |                                           |                                              |                             |                                |                                                          |                                                             |
|                                         |                       | Q3           | 10.44%                                        | 10.83%                                           |                                           |                                              |                             |                                |                                                          |                                                             |
|                                         |                       | Q4           | 16.62%                                        | 16.34%                                           |                                           |                                              |                             |                                |                                                          |                                                             |
|                                         |                       | Q5 (richest) | 56.79%                                        | 56.89%                                           |                                           |                                              |                             |                                |                                                          |                                                             |
| <b>Postnatal care</b>                   | 67.57%                | Q1 (poorest) | 53.98%                                        | 55.64%                                           | 31.93%                                    | 30.52%                                       | 1.59                        | 1.55                           | 0.09<br>(0.07 , 0.11 )                                   | 0.09<br>(0.07 , 0.11)                                       |
|                                         |                       | Q2           | 62.82%                                        | 63.54%                                           |                                           |                                              |                             |                                |                                                          |                                                             |
|                                         |                       | Q3           | 66.31%                                        | 65.55%                                           |                                           |                                              |                             |                                |                                                          |                                                             |
|                                         |                       | Q4           | 73.61%                                        | 72.09%                                           |                                           |                                              |                             |                                |                                                          |                                                             |
|                                         |                       | Q5 (richest) | 85.91%                                        | 86.16%                                           |                                           |                                              |                             |                                |                                                          |                                                             |
| <b>Met need for family planning</b>     | 40.42%                | Q1 (poorest) | 30.65%                                        | 29.32%                                           | 24.10%                                    | 25.18%                                       | 1.79                        | 1.86                           | 0.11<br>(0.09 , 0.13)                                    | 0.12<br>(0.10 , 0.14)                                       |
|                                         |                       | Q2           | 35.77%                                        | 35.20%                                           |                                           |                                              |                             |                                |                                                          |                                                             |
|                                         |                       | Q3           | 36.64%                                        | 38.77%                                           |                                           |                                              |                             |                                |                                                          |                                                             |
|                                         |                       | Q4           | 41.93%                                        | 42.41%                                           |                                           |                                              |                             |                                |                                                          |                                                             |
|                                         |                       | Q5 (richest) | 54.75%                                        | 54.50%                                           |                                           |                                              |                             |                                |                                                          |                                                             |
| <b>Abortion with a skilled provider</b> | 78.36%                | Q1 (poorest) | 58.12%                                        | 62.30%                                           | 31.35%                                    | 27.70%                                       | 1.54                        | 1.44                           | 0.07<br>(0.04 , 0.10)                                    | 0.07<br>(0.04 , 0.10)                                       |
|                                         |                       | Q2           | 75.38%                                        | 73.17%                                           |                                           |                                              |                             |                                |                                                          |                                                             |
|                                         |                       | Q3           | 74.44%                                        | 71.74%                                           |                                           |                                              |                             |                                |                                                          |                                                             |
|                                         |                       | Q4           | 84.33%                                        | 85.38%                                           |                                           |                                              |                             |                                |                                                          |                                                             |
|                                         |                       | Q5 (richest) | 89.47%                                        | 90.00%                                           |                                           |                                              |                             |                                |                                                          |                                                             |

§ Calculated as proportion of service use in richest wealth quintile divided by proportion of service use in poorest quintile

**Table A2ii: Equity in use of reproductive and maternal health services in Cambodia by common and maximum household assets, 2010**

| Service                                 | Overall % service use |              | % service use stratified by SES (max assets) | % service use stratified by SES (common assets) | Equity gap (Q5-Q1, % points) (max assets) | Equity gap (Q5-Q1, % points) (common assets) | Equity ratio (max assets) § | Equity ratio (common assets) § | Indirectly standardised concentration index (max assets) | Indirectly standardised concentration index (common assets) |
|-----------------------------------------|-----------------------|--------------|----------------------------------------------|-------------------------------------------------|-------------------------------------------|----------------------------------------------|-----------------------------|--------------------------------|----------------------------------------------------------|-------------------------------------------------------------|
| <b>4+ Antenatal care</b>                | 57.27%                | Q1 (poorest) | 37.37%                                       | 35.58%                                          | 42.10%                                    | 44.05%                                       | 2.13                        | 2.24                           | 0.15<br>(0.13 , 0.17)                                    | 0.16<br>(0.14 , 0.18)                                       |
|                                         |                       | Q2           | 45.62%                                       | 46.01%                                          |                                           |                                              |                             |                                |                                                          |                                                             |
|                                         |                       | Q3           | 52.73%                                       | 51.60%                                          |                                           |                                              |                             |                                |                                                          |                                                             |
|                                         |                       | Q4           | 63.25%                                       | 66.91%                                          |                                           |                                              |                             |                                |                                                          |                                                             |
|                                         |                       | Q5 (richest) | 79.47%                                       | 79.63%                                          |                                           |                                              |                             |                                |                                                          |                                                             |
| <b>Skilled birth attendance</b>         | 68.81%                | Q1 (poorest) | 42.23%                                       | 42.16%                                          | 54.57%                                    | 54.72%                                       | 2.29                        | 2.30                           | 0.17<br>(0.15 , 0.19)                                    | 0.17<br>(0.15 , 0.19)                                       |
|                                         |                       | Q2           | 53.42%                                       | 51.92%                                          |                                           |                                              |                             |                                |                                                          |                                                             |
|                                         |                       | Q3           | 62.95%                                       | 64.29%                                          |                                           |                                              |                             |                                |                                                          |                                                             |
|                                         |                       | Q4           | 79.32%                                       | 81.20%                                          |                                           |                                              |                             |                                |                                                          |                                                             |
|                                         |                       | Q5 (richest) | 96.80%                                       | 96.88%                                          |                                           |                                              |                             |                                |                                                          |                                                             |
| <b>Facility based delivery</b>          | 53.07%                | Q1 (poorest) | 29.16%                                       | 30.21%                                          | 53.69%                                    | 52.36%                                       | 2.84                        | 2.73                           | 0.22<br>(0.20 , 0.24)                                    | 0.22<br>(0.20 , 0.24)                                       |
|                                         |                       | Q2           | 37.34%                                       | 34.48%                                          |                                           |                                              |                             |                                |                                                          |                                                             |
|                                         |                       | Q3           | 43.98%                                       | 44.94%                                          |                                           |                                              |                             |                                |                                                          |                                                             |
|                                         |                       | Q4           | 57.73%                                       | 60.08%                                          |                                           |                                              |                             |                                |                                                          |                                                             |
|                                         |                       | Q5 (richest) | 82.85%                                       | 82.57%                                          |                                           |                                              |                             |                                |                                                          |                                                             |
| <b>Postnatal care</b>                   | 73.84%                | Q1 (poorest) | 51.81%                                       | 49.45%                                          | 38.36%                                    | 40.88%                                       | 1.74                        | 1.83                           | 0.12<br>(0.10 , 0.14)                                    | 0.13<br>(0.11 , 0.15)                                       |
|                                         |                       | Q2           | 55.83%                                       | 54.25%                                          |                                           |                                              |                             |                                |                                                          |                                                             |
|                                         |                       | Q3           | 59.78%                                       | 63.23%                                          |                                           |                                              |                             |                                |                                                          |                                                             |
|                                         |                       | Q4           | 73.83%                                       | 75.64%                                          |                                           |                                              |                             |                                |                                                          |                                                             |
|                                         |                       | Q5 (richest) | 90.17%                                       | 90.33%                                          |                                           |                                              |                             |                                |                                                          |                                                             |
| <b>Met need for family planning</b>     | 50.96%                | Q1 (poorest) | 41.60%                                       | 39.95%                                          | 13.80%                                    | 15.34%                                       | 1.33                        | 1.38                           | 0.06<br>(0.05 , 0.07)                                    | 0.06<br>(0.05 , 0.07)                                       |
|                                         |                       | Q2           | 46.75%                                       | 49.02%                                          |                                           |                                              |                             |                                |                                                          |                                                             |
|                                         |                       | Q3           | 51.29%                                       | 48.94%                                          |                                           |                                              |                             |                                |                                                          |                                                             |
|                                         |                       | Q4           | 51.03%                                       | 52.04%                                          |                                           |                                              |                             |                                |                                                          |                                                             |
|                                         |                       | Q5 (richest) | 55.40%                                       | 55.29%                                          |                                           |                                              |                             |                                |                                                          |                                                             |
| <b>Abortion with a skilled provider</b> | 84.48% *              | Q1 (poorest) | 77.26%                                       | 76.90%                                          | 6.43%                                     | 6.09%                                        | 1.08                        | 1.08                           | 0.01<br>(-0.02 , 0.04)                                   | 0.01<br>(-0.02 , 0.04)                                      |
|                                         |                       | Q2           | 79.64%                                       | 80.06%                                          |                                           |                                              |                             |                                |                                                          |                                                             |
|                                         |                       | Q3           | 84.84%                                       | 85.95%                                          |                                           |                                              |                             |                                |                                                          |                                                             |
|                                         |                       | Q4           | 85.65%                                       | 86.56%                                          |                                           |                                              |                             |                                |                                                          |                                                             |
|                                         |                       | Q5 (richest) | 83.69%                                       | 82.99%                                          |                                           |                                              |                             |                                |                                                          |                                                             |

§ Calculated as proportion of service use in richest wealth quintile divided by proportion of service use in poorest quintile

\* Excludes all women who report having a medical abortion, which can be administered at home
