# Supplementary material for: A decade of improvements in equity of access to reproductive and maternal health services in Cambodia, 2000–2010
Source: PubMed Central journal article supplement (PMC3723953; doi:10.1186/1475-9276-12-51), 2013-07-09
Supplement: 1475-9276-12-51-S3.pdf [file 1475-9276-12-51-S3.pdf]

**Table A3****Table A3i: Descriptive statistics, women using antenatal care, Cambodia, DHS 2000-2010**

| Variable                               | 2000  |                    | 2005  |                    | 2010  |                    |
|----------------------------------------|-------|--------------------|-------|--------------------|-------|--------------------|
|                                        | Mean  | Standard deviation | Mean  | Standard deviation | Mean  | Standard deviation |
| Age (years)                            | 31.15 | 6.98               | 30.13 | 7.18               | 29.32 | 6.60               |
| Age at delivery (years)                | 29.57 | 6.75               | 28.52 | 6.9                | 27.63 | 6.31               |
| Age at first marriage (years)          | 19.31 | 3.76               | 19.46 | 3.78               | 19.74 | 3.66               |
| Parity (births)                        | 3.89  | 2.49               | 3.23  | 2.21               | 2.68  | 1.84               |
| Household size (people)                | 6.11  | 2.20               | 5.70  | 2.22               | 5.60  | 2.15               |
| Urban residence                        | 0.14  | 0.34               | 0.14  | 0.35               | 0.16  | 0.37               |
| <b>Highest level of education</b>      |       |                    |       |                    |       |                    |
| No education                           | 0.32  | 0.47               | 0.23  | 0.42               | 0.17  | 0.38               |
| Primary                                | 0.54  | 0.50               | 0.59  | 0.49               | 0.56  | 0.50               |
| Secondary                              | 0.14  | 0.35               | 0.17  | 0.38               | 0.25  | 0.43               |
| Higher                                 | 0.002 | 0.04               | 0.01  | 0.07               | 0.02  | 0.13               |
| <b>Religion</b>                        |       |                    |       |                    |       |                    |
| Buddhist                               | 0.96  | 0.19               | 0.97  | 0.18               | 0.97  | 0.18               |
| Muslim                                 | 0.02  | 0.15               | 0.02  | 0.13               | 0.02  | 0.13               |
| Christian                              | 0.002 | 0.05               | 0.004 | 0.07               | 0.00  | 0.06               |
| Other                                  | 0.01  | 0.12               | 0.01  | 0.11               | 0.01  | 0.11               |
| <b>Marital status</b>                  |       |                    |       |                    |       |                    |
| Never married                          | 0     | 0                  | 0.00  | 0.02               | 0.00  | 0.02               |
| Living together                        | -     | -                  | 0.003 | 0.06               | 0.01  | 0.08               |
| Married                                | 0.94  | 0.24               | 0.94  | 0.23               | 0.95  | 0.22               |
| Widowed                                | 0.04  | 0.19               | 0.03  | 0.18               | 0.02  | 0.19               |
| Divorced                               | 0.02  | 0.14               | 0.03  | 0.18               | 0.04  | 0.23               |
| Not living together                    | 0.01  | 0.08               | 0.02  | 0.16               | 0.02  | 0.17               |
| <b>Husband's occupation</b>            |       |                    |       |                    |       |                    |
| Did not work                           | 0.02  | 0.16               | -     | -                  | 0.00  | 0.06               |
| Professional/technician/manager        | 0.07  | 0.26               | 0.04  | 0.21               | 0.08  | 0.26               |
| Clerical                               | 0.01  | 0.09               | 0.02  | 0.14               | 0.01  | 0.12               |
| Sales                                  | 0.04  | 0.19               | 0.06  | 0.24               | 0.06  | 0.23               |
| Agricultural self-employed             | -     | -                  | 0.50  | 0.50               | 0.54  | 0.50               |
| Agricultural employee                  | 0.71  | 0.45               | 0.12  | 0.32               | -     | -                  |
| Services                               | 0.01  | 0.11               | 0.05  | 0.21               | 0.05  | 0.22               |
| Skilled manual                         | 0.09  | 0.29               | 0.12  | 0.32               | 0.25  | 0.43               |
| Unskilled manual                       | 0.04  | 0.20               | 0.09  | 0.29               | 0.01  | 0.09               |
| At least 4 ANC visits during pregnancy | 0.09  | 0.29               | 0.27  | 0.44               | 0.60  | 0.49               |

N (2000) = 6049; N (2005) = 6075; N (2010) = 6371

**Table A3ii: Descriptive statistics, women with skilled birth attendance at delivery, Cambodia, DHS 2000-2010**

| Variable                                 | 2000  |                    | 2005  |                    | 2010  |                    |
|------------------------------------------|-------|--------------------|-------|--------------------|-------|--------------------|
|                                          | Mean  | Standard deviation | Mean  | Standard deviation | Mean  | Standard deviation |
| Age (years)                              | 31.03 | 6.74               | 29.92 | 6.96               | 29.22 | 6.41               |
| Age at delivery (years)                  | 28.98 | 6.64               | 27.94 | 6.81               | 27.22 | 6.22               |
| Age at first marriage (years)            | 19.44 | 3.74               | 19.42 | 3.74               | 19.71 | 3.67               |
| Parity (births)                          | 4.1   | 2.49               | 3.38  | 2.20               | 2.84  | 1.88               |
| Household size (people)                  | 6.17  | 2.18               | 5.80  | 2.23               | 5.67  | 2.18               |
| Urban residence                          | 0.13  | 0.34               | 0.14  | 0.35               | 0.16  | 0.36               |
| <b>Highest level of education</b>        |       |                    |       |                    |       |                    |
| No education                             | 0.33  | 0.47               | 0.24  | 0.43               | 0.18  | 0.39               |
| Primary                                  | 0.54  | 0.5                | 0.59  | 0.49               | 0.57  | 0.50               |
| Secondary                                | 0.14  | 0.34               | 0.16  | 0.37               | 0.23  | 0.42               |
| Higher                                   | 0.002 | 0.04               | 0.01  | 0.07               | 0.02  | 0.12               |
| <b>Religion</b>                          |       |                    |       |                    |       |                    |
| Buddhist                                 | 0.96  | 0.19               | 0.96  | 0.19               | 0.97  | 0.18               |
| Muslim                                   | 0.02  | 0.14               | 0.02  | 0.13               | 0.05  | 0.12               |
| Christian                                | 0.002 | 0.05               | 0.004 | 0.07               | 0.00  | 0.06               |
| Other                                    | 0.02  | 0.12               | 0.01  | 0.12               | 0.01  | 0.12               |
| <b>Marital status</b>                    |       |                    |       |                    |       |                    |
| Never married                            | 0     | 0                  | 0.001 | 0.02               | 0.00  | 0.02               |
| Living together                          | -     | -                  | 0.004 | 0.06               | 0.01  | 0.08               |
| Married                                  | 0.95  | 0.22               | 0.95  | 0.22               | 0.95  | 0.21               |
| Widowed                                  | 0.03  | 0.17               | 0.02  | 0.18               | 0.02  | 0.19               |
| Divorced                                 | 0.02  | 0.13               | 0.03  | 0.18               | 0.04  | 0.23               |
| Not living together                      | 0.01  | 0.08               | 0.02  | 0.16               | 0.02  | 0.17               |
| <b>Husband's occupation</b>              |       |                    |       |                    |       |                    |
| Did not work                             | 0.02  | 0.16               | -     | -                  | 0.00  | 0.06               |
| Professional/technician/manager          | 0.07  | 0.25               | 0.04  | 0.20               | 0.07  | 0.26               |
| Clerical                                 | 0.01  | 0.09               | 0.02  | 0.14               | 0.01  | 0.11               |
| Sales                                    | 0.04  | 0.19               | 0.06  | 0.24               | 0.06  | 0.23               |
| Agricultural self-employed               | -     | -                  | 0.50  | 0.50               | 0.55  | 0.50               |
| Agricultural employee                    | 0.72  | 0.45               | 0.12  | 0.33               | -     | -                  |
| Services                                 | 0.01  | 0.11               | 0.04  | 0.21               | 0.05  | 0.22               |
| Skilled manual                           | 0.09  | 0.28               | 0.12  | 0.32               | 0.25  | 0.43               |
| Unskilled manual                         | 0.04  | 0.19               | 0.09  | 0.29               | 0.01  | 0.09               |
| Skilled birth attendance during delivery | 0.32  | 0.47               | 0.44  | 0.50               | 0.71  | 0.45               |

N (2000) = 8729; N (2005) = 8201; N (2010) = 8115

Table A3iii: Descriptive statistics, women with facility based delivery, Cambodia, DHS 2000-2010

| Year                              | 2000  |                    | 2005  |                    | 2010  |                    |
|-----------------------------------|-------|--------------------|-------|--------------------|-------|--------------------|
|                                   | Mean  | Standard deviation | Mean  | Standard deviation | Mean  | Standard deviation |
| Age (years)                       | 31.03 | 6.74               | 29.92 | 6.96               | 29.22 | 6.41               |
| Age at delivery (years)           | 28.98 | 6.64               | 29.88 | 6.94               | 27.22 | 6.22               |
| Age at first marriage (years)     | 19.43 | 3.74               | 19.42 | 3.74               | 19.65 | 3.72               |
| Parity (births)                   | 4.11  | 2.49               | 3.38  | 2.20               | 2.84  | 1.88               |
| Household size (people)           | 6.17  | 2.18               | 5.80  | 2.23               | 5.68  | 2.18               |
| Urban residence                   | 0.13  | 0.34               | 0.14  | 0.35               | 0.16  | 0.36               |
| <b>Highest level of education</b> |       |                    |       |                    |       |                    |
| No education                      | 0.33  | 0.47               | 0.24  | 0.43               | 0.18  | 0.39               |
| Primary                           | 0.53  | 0.50               | 0.59  | 0.49               | 0.56  | 0.50               |
| Secondary                         | 0.13  | 0.34               | 0.16  | 0.37               | 0.23  | 0.42               |
| Higher                            | 0.00  | 0.04               | 0.01  | 0.07               | 0.01  | 0.12               |
| <b>Religion</b>                   |       |                    |       |                    |       |                    |
| Buddhist                          | 0.96  | 0.19               | 0.96  | 0.19               | 0.97  | 0.18               |
| Muslim                            | 0.02  | 0.14               | 0.02  | 0.13               | 0.01  | 0.12               |
| Christian                         | 0.00  | 0.05               | 0.00  | 0.07               | 0.00  | 0.06               |
| Other                             | 0.02  | 0.12               | 0.14  | 0.12               | 0.01  | 0.12               |
| <b>Marital status</b>             |       |                    |       |                    |       |                    |
| Never married                     | 0.00  | 0.00               | 0.00  | 0.02               | 0.00  | 0.02               |
| Living together                   | -     | -                  | 0.00  | 0.06               | 0.01  | 0.08               |
| Married                           | 0.95  | 0.22               | 0.95  | 0.22               | 0.95  | 0.21               |
| Widowed                           | 0.03  | 0.17               | 0.02  | 0.18               | 0.02  | 0.19               |
| Divorced                          | 0.02  | 0.13               | 0.03  | 0.18               | 0.04  | 0.23               |
| Not living together               | 0.01  | 0.08               | 0.02  | 0.16               | 0.02  | 0.17               |
| <b>Husband's occupation</b>       |       |                    |       |                    |       |                    |
| Did not work                      | 0.02  | 0.16               | -     | -                  | 0.00  | 0.06               |
| Professional/technician/manager   | 0.07  | 0.25               | 0.04  | 0.20               | 0.07  | 0.26               |
| Clerical                          | 0.01  | 0.09               | 0.02  | 0.14               | 0.01  | 0.11               |
| Sales                             | 0.04  | 0.19               | 0.06  | 0.24               | 0.05  | 0.23               |
| Agricultural self-employed        | -     | -                  | 0.50  | 0.50               | 0.55  | 0.50               |
| Agricultural employee             | 0.72  | 0.45               | 0.12  | 0.33               | -     | -                  |
| Services                          | 0.01  | 0.11               | 0.04  | 0.21               | 0.05  | 0.22               |
| Skilled manual                    | 0.09  | 0.28               | 0.12  | 0.32               | 0.25  | 0.43               |
| Unskilled manual                  | 0.04  | 0.19               | 0.09  | 0.29               | 0.01  | 0.09               |
| Facility based delivery           | 0.10  | 0.30               | 0.21  | 0.41               | 0.53  | 0.50               |

N (2000) = 8746; N (2005) = 8201; N (2010) = 8138

Table A3iv: Descriptive statistics, women receiving postnatal care, Cambodia, DHS 2000-2010

| Variable                            | 2000  |                    | 2005  |                    | 2010  |                    |
|-------------------------------------|-------|--------------------|-------|--------------------|-------|--------------------|
|                                     | Mean  | Standard deviation | Mean  | Standard deviation | Mean  | Standard deviation |
| Age (years)                         | 31.03 | 6.75               | 30.13 | 7.18               | 29.34 | 6.61               |
| Age at delivery (years)             | 28.98 | 6.64               | 28.52 | 6.90               | 27.64 | 6.32               |
| Age at first marriage (years)       | 19.43 | 3.74               | 19.46 | 3.78               | 19.74 | 3.66               |
| Parity (births)                     | 4.11  | 2.49               | 3.23  | 2.21               | 12.69 | 1.84               |
| Household size (people)             | 6.17  | 2.18               | 5.70  | 2.22               | 5.60  | 2.15               |
| Urban residence                     | 0.13  | 0.34               | 0.14  | 0.35               | 0.16  | 0.37               |
| <b>Highest level of education</b>   |       |                    |       |                    |       |                    |
| No education                        | 0.33  | 0.47               | 0.23  | 0.42               | 0.17  | 0.38               |
| Primary                             | 0.53  | 0.50               | 0.59  | 0.49               | 0.56  | 0.50               |
| Secondary                           | 0.13  | 0.34               | 0.17  | 0.38               | 0.25  | 0.43               |
| Higher                              | 0.00  | 0.04               | 0.01  | 0.07               | 0.02  | 0.13               |
| <b>Religion</b>                     |       |                    |       |                    |       |                    |
| Buddhist                            | 0.96  | 0.19               | 0.97  | 0.18               | 0.97  | 0.18               |
| Muslim                              | 0.02  | 0.14               | 0.02  | 0.13               | 0.02  | 0.13               |
| Christian                           | 0.00  | 0.05               | 0.0   | 0.07               | 0.00  | 0.06               |
| Other                               | 0.02  | 0.12               | 0.01  | 0.11               | 0.01  | 0.11               |
| <b>Marital status</b>               |       |                    |       |                    |       |                    |
| Never married                       | 0.00  | 0.00               | 0.00  | 0.02               | 0.00  | 0.02               |
| Living together                     | -     | -                  | 0.00  | 0.06               | 0.01  | 0.08               |
| Married                             | 0.95  | 0.22               | 0.94  | 0.23               | 0.95  | 0.22               |
| Widowed                             | 0.03  | 0.17               | 0.03  | 0.18               | 0.02  | 0.19               |
| Divorced                            | 0.02  | 0.13               | 0.03  | 0.18               | 0.04  | 0.23               |
| Not living together                 | 0.01  | 0.08               | 0.02  | 0.16               | 0.02  | 0.17               |
| <b>Husband's occupation</b>         |       |                    |       |                    |       |                    |
| Did not work                        | 0.02  | 0.16               | -     | -                  | 0.00  | 0.06               |
| Professional/technician/manager     | 0.07  | 0.25               | 0.04  | 0.21               | 0.08  | 0.26               |
| Clerical                            | 0.01  | 0.09               | 0.02  | 0.14               | 0.01  | 0.12               |
| Sales                               | 0.04  | 0.19               | 0.06  | 0.24               | 0.06  | 0.23               |
| Agricultural self-employed          | -     | -                  | 0.5   | 0.5                | 0.54  | 0.50               |
| Agricultural employee               | 0.72  | 0.45               | 0.12  | 0.32               | -     | -                  |
| Services                            | 0.01  | 0.11               | 0.05  | 0.21               | 0.05  | 0.22               |
| Skilled manual                      | 0.09  | 0.28               | 0.12  | 0.32               | 0.25  | 0.43               |
| Unskilled manual                    | 0.04  | 0.19               | 0.09  | 0.29               | 0.01  | 0.09               |
| Postnatal care visit after delivery | 0.55  | 0.50               | 0.70  | 0.46               | 0.74  | 0.44               |

N (2000) = 8737; N (2005) = 6076; N (2010) = 6374

**Table A3v: Descriptive statistics, currently married women, Cambodia, DHS 2000-2010**

| Variable                          | 2000  |                    | 2005  |                    | 2010  |                    |
|-----------------------------------|-------|--------------------|-------|--------------------|-------|--------------------|
|                                   | Mean  | Standard deviation | Mean  | Standard deviation | Mean  | Standard deviation |
| Age (years)                       | 33.5  | 8.32               | 33.6  | 8.69               | 33.34 | 8.66               |
| Age at first marriage (years)     | 19.27 | 3.8                | 19.47 | 3.75               | 19.67 | 3.79               |
| Household size (people)           | 6.05  | 2.16               | 5.67  | 2.19               | 5.46  | 2.08               |
| Urban residence                   | 0.16  | 0.36               | 0.15  | 0.36               | 1.82  | 0.38               |
| <b>Highest level of education</b> |       |                    |       |                    |       |                    |
| No education                      | 0.35  | 0.48               | 0.23  | 0.42               | 0.19  | 0.39               |
| Primary                           | 0.53  | 0.50               | 0.59  | 0.49               | 0.56  | 0.50               |
| Secondary                         | 0.12  | 0.33               | 0.17  | 0.38               | 0.24  | 0.43               |
| Higher                            | 0.002 | 0.04               | 0.01  | 0.08               | 0.01  | 0.12               |
| <b>Religion</b>                   |       |                    |       |                    |       |                    |
| Buddhist                          | 0.92  | 0.26               | 0.97  | 0.17               | 0.97  | 0.16               |
| Muslim                            | 0.02  | 0.15               | 0.02  | 0.13               | 0.01  | 0.12               |
| Christian                         | 0.002 | 0.05               | 0.00  | 0.06               | 0.00  | 0.06               |
| Other                             | 0.05  | 0.22               | 0.01  | 0.10               | 0.01  | 0.10               |
| <b>Husband's occupation</b>       |       |                    |       |                    |       |                    |
| Did not work                      | 0.02  | 0.15               | -     | -                  | 0.01  | 0.09               |
| Professional/technician/manager   | 0.10  | 0.30               | 0.06  | 0.24               | 0.08  | 0.28               |
| Clerical                          | 0.01  | 0.10               | 0.02  | 0.15               | 0.02  | 0.12               |
| Sales                             | 0.04  | 0.20               | 0.07  | 0.25               | 0.06  | 0.24               |
| Agricultural self-employed        | -     | -                  | 0.49  | 0.50               | 0.55  | 0.50               |
| Agricultural employee             | 0.70  | 0.46               | 0.11  | 0.32               | -     | -                  |
| Services                          | 0.01  | 0.1                | 0.05  | 0.22               | 0.06  | 0.24               |
| Skilled manual                    | 0.09  | 0.28               | 0.11  | 0.31               | 0.22  | 0.41               |
| Unskilled manual                  | 0.03  | 0.18               | 0.08  | 0.27               | 0.01  | 0.09               |
| Met need for family planning      | 0.24  | 0.43               | 0.40  | 0.49               | 0.51  | 0.50               |

N (2000) = 9306; N (2005) = 10164; N (2010) = 11439

Table A3vi: Descriptive statistics, women reporting an abortion, Cambodia, DHS 2000-2010

| Variable                          | 2000  |                    | 2005  |                    | 2010  |                    |
|-----------------------------------|-------|--------------------|-------|--------------------|-------|--------------------|
|                                   | Mean  | Standard deviation | Mean  | Standard deviation | Mean  | Standard deviation |
| Age (years)                       | 34.84 | 6.83               | 32.62 | 7.16               | 36.25 | 7.07               |
| Age at first marriage (years)     | 19.56 | 3.97               | 19.07 | 3.8                | 18.94 | 3.54               |
| Household size (people)           | 6.08  | 2.01               | 5.62  | 2.46               | 5.60  | 2.01               |
| Urban residence                   | 0.20  | 0.40               | 0.25  | 0.44               | 0.2   | 0.4                |
| <b>Highest level of education</b> |       |                    |       |                    |       |                    |
| No education                      | 0.27  | 0.45               | 0.21  | 0.41               | 0.18  | 0.39               |
| Primary                           | 0.60  | 0.49               | 0.58  | 0.49               | 0.67  | 0.47               |
| Secondary                         | 0.13  | 0.33               | 0.21  | 0.41               | 0.15  | 0.35               |
| Higher                            | 0.00  | 0.00               | 0.00  | 0.06               | 0.00  | 0.06               |
| <b>Religion</b>                   |       |                    |       |                    |       |                    |
| Buddhist                          | 0.97  | 0.15               | 0.99  | 0.12               | 0.99  | 0.10               |
| Muslim                            | 0.02  | 0.13               | 0.01  | 0.08               | 0.01  | 0.09               |
| Christian                         | 0.01  | 0.08               | 0.01  | 0.09               | 0.00  | 0.02               |
| Other                             | 0.00  | 0.04               | 0.00  | 0.00               | 0.00  | 0.02               |
| <b>Marital status</b>             |       |                    |       |                    |       |                    |
| Never married                     | 0.00  | 0.00               | 0.00  | 0.00               | 0.00  | 0.00               |
| Living together                   | -     | -                  | 0.01  | 0.12               | 0.97  | 0.18               |
| Married                           | 0.95  | 0.21               | 0.94  | 0.25               | 0.01  | 0.08               |
| Widowed                           | 0.02  | 0.15               | 0.04  | 0.26               | 0.02  | 0.18               |
| Divorced                          | 0.02  | 0.15               | 0.04  | 0.26               | 0.03  | 0.20               |
| Not living together               | 0.00  | 0.00               | 0.06  | 0.29               | 0.01  | 0.15               |
| <b>Husband's occupation</b>       |       |                    |       |                    |       |                    |
| Did not work                      | 0.03  | 0.18               | -     | -                  | 0.01  | 0.08               |
| Professional/technician/manager   | 0.15  | 0.36               | 0.07  | 0.25               | 0.05  | 0.21               |
| Clerical                          | 0.00  | 0.07               | 0.05  | 0.21               | 0.01  | 0.12               |
| Sales                             | 0.08  | 0.27               | 0.06  | 0.23               | 0.05  | 0.21               |
| Agricultural self-employed        | -     | -                  | 0.34  | 0.47               | 0.51  | 0.50               |
| Agricultural employee             | 0.47  | 0.50               | 0.11  | 0.31               | -     | -                  |
| Services                          | 0.02  | 0.15               | 0.12  | 0.33               | 0.08  | 0.26               |
| Skilled manual                    | 0.16  | 0.37               | 0.17  | 0.37               | 0.29  | 0.45               |
| Unskilled manual                  | 0.09  | 0.28               | 0.09  | 0.28               | 0.01  | 0.11               |
| Abortion with skilled provider    | 0.82  | 0.39               | 0.78  | 0.41               | 0.84  | 0.36               |

N (2000) = 261; N (2005) = 617; N (2010) = 2101
